# Supplementary material for: Metal free alkene hydrogenation by B-doped graphitic carbon nitride
Source: Royal Society of Chemistry journal article supplement (doi:10.1039/d0cy00488j), 2020-01-01
Supplement: d0cy00488j1.pdf [file d0cy00488j1.pdf]

## Supplementary Information For:

### Metal free alkene hydrogenation by B- doped graphitic carbon nitride

Ashima Dogra, Ilaria Barlocco, Amritpal Singh, Ferenc Somodi, Alberto Villa\* and  
NeerajGupta\*

#### 1. Preparation of catalyst

##### 1.1 g- C<sub>3</sub>N<sub>4</sub>

8g urea was taken in a well dried covered crucible. The contents were heated in muffle furnace for 30 minutes at 450°C. Cooled the contents to room temperature and stored in dried vessel (25-30°C).

##### 1.2 FBCN

8g urea was taken and 0.8 ml HBF<sub>4</sub> (0.002 moles) was added to it. The contents were heated in muffle furnace for 40 minutes at 450°C. Cooled the contents to room temperature and stored in dried vessel (25-30°C).

##### 1.3 OBCN

OBCN was prepared by using 8g urea and aqueous solution of H<sub>3</sub>BO<sub>3</sub> (0.002 moles; the boric acid solution was prepared by adding 0.123 g of boric acid in 4 ml distilled water). The contents were heated for 40 minutes at 450°C. Cooled the contents to room temperature and stored in dried vessel (25-30°C).

#### 2. Characterization

##### 2.1 SEM-EDX

SEM-EDX spectrum and elemental map of material FBCN in Fig S1 and S2.

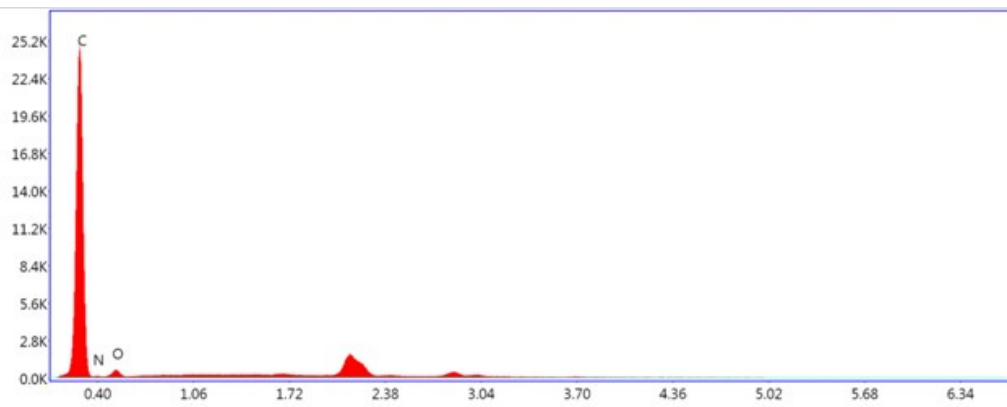

**Figure S1. EDX spectrum of FBCN**

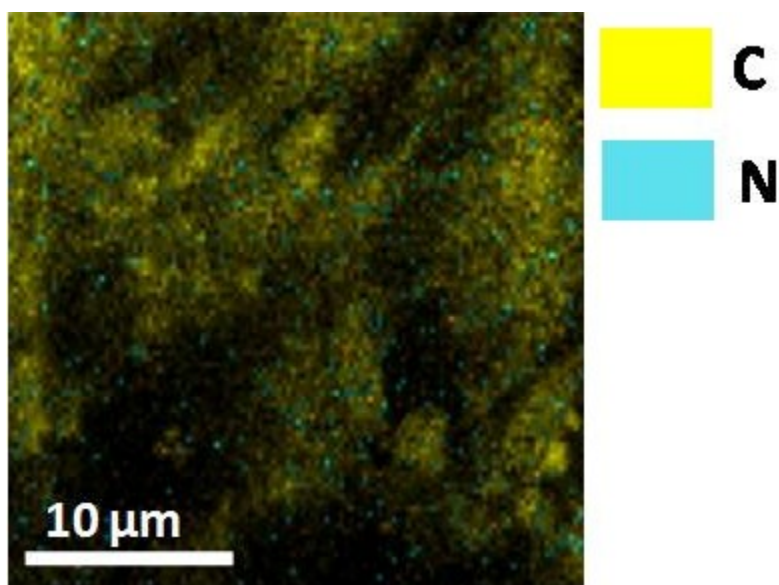

**Figure S2. Elemental Map of FBCN showing N species**

## 2.2 FTIR Spectroscopy

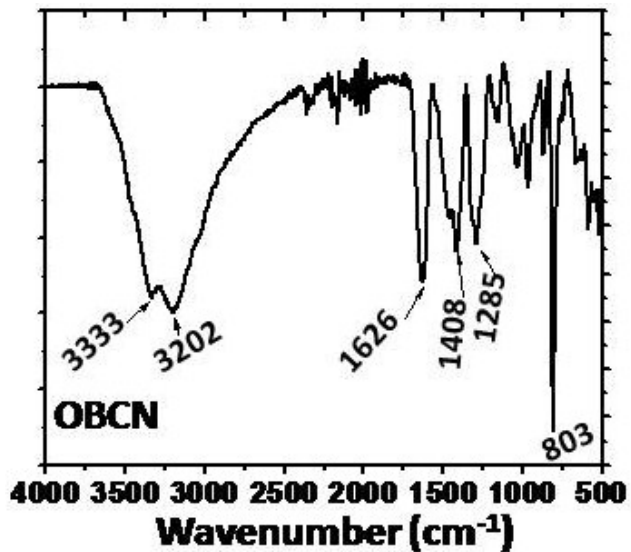

Figure S3. FTIR spectra of OBCN

## 2.3 Reaction scheme of BN model for DFT calculations

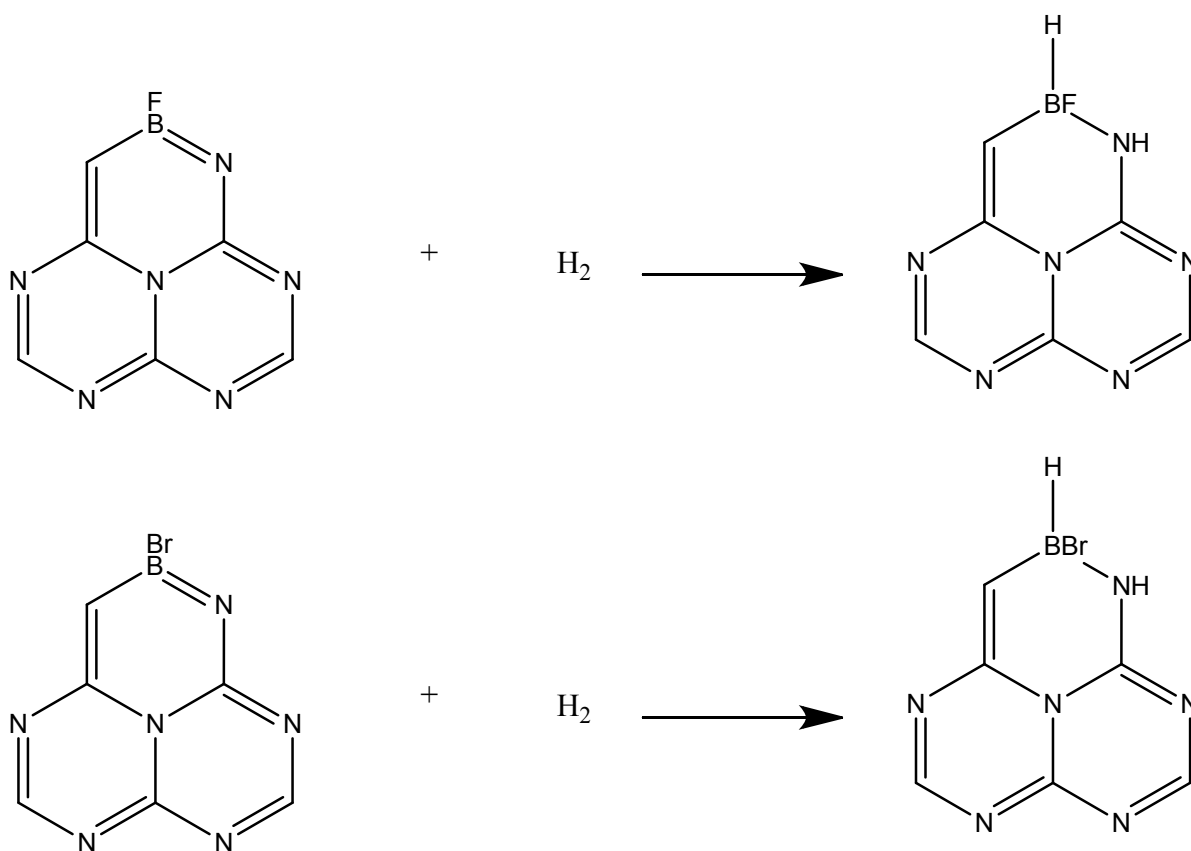

Figure S4. Reaction of model BN molecule containing F and Br atoms with hydrogen molecule

### 3. Hydrogenation of Styrene

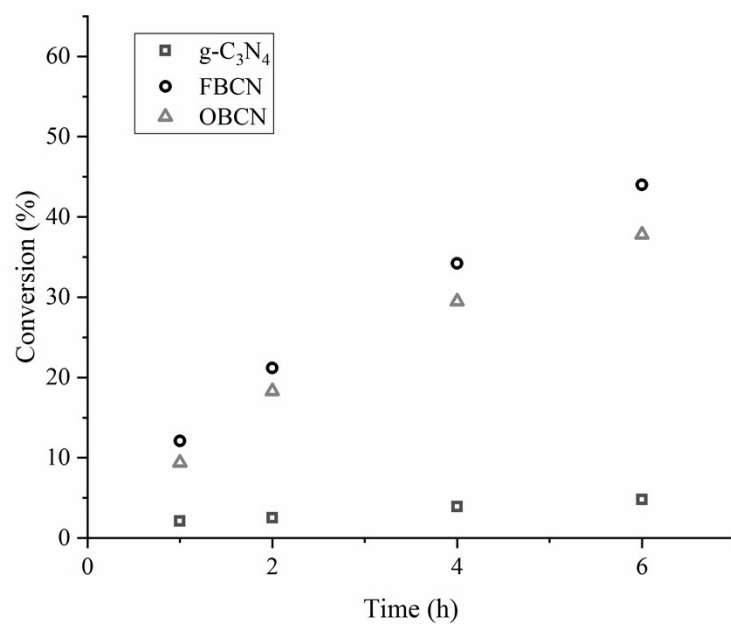

Figure S5. Conversion vs time of g-C<sub>3</sub>N<sub>4</sub>, FBCN and OBCN catalysts at 150°C
